# Supplementary material for: Tumor-Associated Microglia/Macrophages as a Predictor for Survival in Glioblastoma and Temozolomide-Induced Changes in CXCR2 Signaling with New Resistance Overcoming Strategy by Combination Therapy
Source: MDPI journal article supplement (doi:10.3390/ijms222011180), 2021-10-16
Supplement: s1 [file s1]

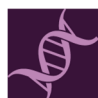

# Supplementary Materials

## Supplementary Tables

**Table S1.** Patients' characteristics stratified in groups.

| Study Cohort: <i>n</i> = 38                      | <i>n</i>    | %         | <i>p</i> -value |
|--------------------------------------------------|-------------|-----------|-----------------|
| Patient Characteristics                          |             |           |                 |
| gender (f/m)                                     | 13/25       | 34/66     | ] 0.22          |
| Standard                                         | 8/10        | 44/56     |                 |
| Not Standard                                     | 5/20        | 25/75     |                 |
| age at diagnosis of pGBM in years (MW ± SD)      | 58.7 ± 12.9 |           | ] 0.41          |
| Standard                                         | 56.8 ± 12.3 |           |                 |
| Not Standard                                     | 60.3 ± 13.5 |           |                 |
| age at diagnosis of rGBM in years (MW ± SD)      | 59.6 ± 12.8 |           | ] 0.50          |
| Standard                                         | 58.2 ± 12.3 |           |                 |
| Not Standard                                     | 61.0 ± 13.5 |           |                 |
| Histopathological Characteristics of Primary GBM |             |           |                 |
| MGMT (methylated ≥10%/unmethylated <10%)         | 16/22       | 42/58     | ] 0.22          |
| Standard                                         | 10/8        | 55/45     |                 |
| Not Standard                                     | 6/20        | 30/70     |                 |
| IDH1/2-Status (wt/mut)                           | 37/1        | 97.4/2.6  | ] 0.30          |
| Standard                                         | 17/1        | 94.5/5.5  |                 |
| Not Standard                                     | 20/0        | 100/0     |                 |
| TP53 (+/-)                                       | 34/4        | 89.5/10.5 | ] 0.05          |
| Standard                                         | 18/0        | 100/0     |                 |
| Not Standard                                     | 16/4        | 80/20     |                 |
| IBA1 cells/mm² (MW ± SD)                         | 520 ± 330   |           | ] 0.95          |
| Standard                                         | 518 ± 309   |           |                 |
| Not Standard                                     | 523 ± 356   |           |                 |
| VEGF expression (MW ± SD)                        | 2.2 ± 2.1   |           | ] 0.56          |
| Standard                                         | 2.4 ± 1.7   |           |                 |
| Not Standard                                     | 2.0 ± 2.4   |           |                 |
| CXCL2 expression (MW ± SD)                       | 3.1 ± 2.1   |           | ] 0.27          |
| Standard                                         | 2.6 ± 2.3   |           |                 |
| Not Standard                                     | 3.4 ± 1.8   |           |                 |
| IL8 expression                                   | 43%         |           | ] 0.33          |
| Standard                                         | 44.4%       |           |                 |
| Not Standard                                     | 42.1%       |           |                 |

f = female; m = male; wt = wild type; mut = mutant; + = mutant; - = not mutant, pGBM = primary GBM, rGBM = recurrent GBM. Supplementary table 1 contains the clinical information of all patients and the subgroup analysis of patients receiving the standard therapy according to Stupp's protocol [1] with ≥ 4 adjuvant cycles of TMZ (Standard) and patients receiving ≤3 adjuvant cycles of TMZ (not standard).

**Table S2.** Cox-regression analysis excluding CXCR2 negative patients ( $n = 18$ ).

| OS                                   | univariate analysis |      |                                | multiple analysis |      |                                |
|--------------------------------------|---------------------|------|--------------------------------|-------------------|------|--------------------------------|
|                                      | <i>p</i> -value     | HR   | 95% CI                         | <i>p</i> -value   | HR   | 95% CI                         |
| <b>pIBA1</b>                         | 0.02                | 1.00 | 1.00 - 1.00                    | 0.03              | 1.01 | 1.00 – 1.03                    |
| <b>pCXCR2<sup>+</sup>vessel area</b> | 0.15                | 0.00 | 0.00 - 1457 x 10 <sup>30</sup> | 0.08              | 0.00 | 0.00 - 2078 x 10 <sup>10</sup> |
| <b>TMZ cycles</b>                    | 0.20                | 0.94 | 0.86 - 1.03                    | 0.26              | 0.90 | 0.74 - 1.08                    |

p = primary tumor; TMZ = temozolomide; HR = Hazard Ratio; 95% CI = 95% confidence interval.

**Table S3.** Primer sequences for qRT-PCR

| Gene       | Primer Orientation | Sequence 5' → 3'         |
|------------|--------------------|--------------------------|
| 18s [2]    | forward            | AACCCGTTGAACCCCAT        |
|            | reverse            | CCATCCAATCGGTAGTAGCG     |
| Bax [3]    | forward            | TGAAGACAGGGGCCTTTTGT     |
|            | reverse            | AATTCGCCGGAGACACTCG      |
| Bcl2 [4]   | forward            | GTCGCTACCGTCGTGACTTC     |
|            | reverse            | CAGACATGCACCTACCCAGC     |
| Cxcl2 [2]  | forward            | CGCTGTCAATGCCTGAAG       |
|            | reverse            | GGCGTCACACTCAAGCTCT      |
| Cxcr2 [5]  | forward            | AGCAAACACCTCTACTACCCTCTA |
|            | reverse            | GGGCTGCATCAATTCAAATACCA  |
| Cxcr1 [6]  | forward            | AATCTGTTGTGGCTTCACCCA    |
|            | reverse            | GCTATCTTCCGCCAGGCATAT    |
| Vegf [2]   | forward            | GAAGAAGAGGCCTGGTAATGG    |
|            | reverse            | AAGCCACTCACACACACAGC     |
| Vegfr1 [2] | forward            | CTAATGACGATGGCAACAGG     |
|            | reverse            | GCTAGCATGCTCTGCTCTCC     |
| Vegfr2 [2] | forward            | TGGAGGAAGAGGAAGTGTGC     |
|            | reverse            | TCAGCTCTTCTGATGCAAGG     |

Primer sequences were purchased from TIB MOLBIOL, Berlin, Germany.

## Supplementary Figures

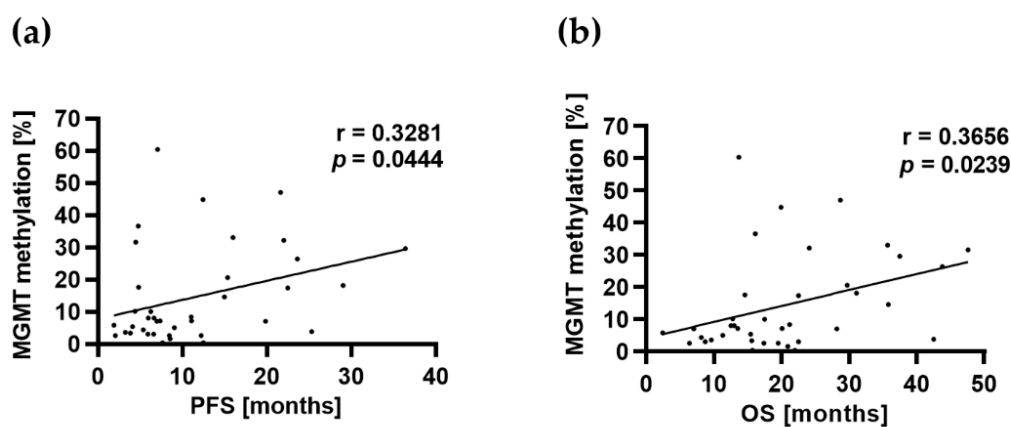

**Figure S1.** Pearson correlation analyses of the MGMT-status with PFS and OS of GBM patients. Statistical evaluation of clinical data with pearson correlation analyses. **(a,b)** MGMT methylation significantly correlates with a prolonged PFS and OS. Correlation coefficient according to pearson's correlation analysis, linear regression analyses were performed.  $r$  and significant  $p$  values are indicated;  $p \leq 0.05$  was considered statistically significant,  $n = 38$

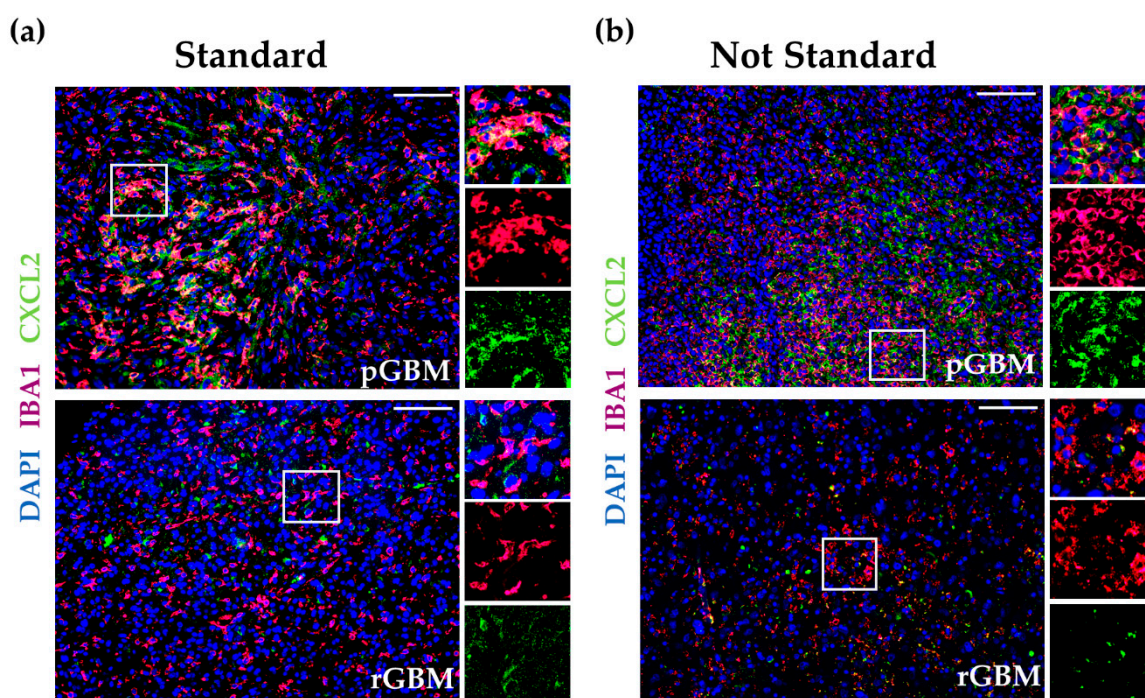

**Figure S2.** CXCL2 expressing TAMs. (a, b) Representative immunofluorescence staining of TAMs (IBA1) in magenta, CXCL2 in green and cell nuclei (DAPI) in blue of the standard and not standard group in primary and recurrent tumors of GBM patients, scale bar 100  $\mu\text{m}$ .

## References

1. Stupp, R.; Mason, W.P.; van den Bent, M.J.; Weller, M.; Fisher, B.; Taphoorn, M.J.; Belanger, K.; Brandes, A.A.; Marosi, C.; Bogdahn, U.; et al. Radiotherapy plus concomitant and adjuvant temozolomide for glioblastoma. *N Engl J Med* **2005**, *352*, 987–996, doi:10.1056/NEJMoa043330.
2. Brandenburg, S.; Muller, A.; Turkowski, K.; Radev, Y.T.; Rot, S.; Schmidt, C.; Bungert, A.D.; Acker, G.; Schorr, A.; Hippe, A.; et al. Resident microglia rather than peripheral macrophages promote vascularization in brain tumors and are source of alternative pro-angiogenic factors. *Acta Neuropathol* **2016**, *131*, 365–378, doi:10.1007/s00401-015-1529-6.
3. Tao, J.; Shen, X.; Ai, Y.; Han, X. Tea polyphenols protect against ischemia/reperfusion-induced liver injury in mice through anti-oxidative and anti-apoptotic properties. *Exp Ther Med* **2016**, *12*, 3433–3439, doi:10.3892/etm.2016.3789.
4. Huang, Q.; Xiong, H.; Yang, H.; Ou, Y.; Zhang, Z.; Chen, S.; Ye, Y.; Zheng, Y. Differential Expression of Bcl-2 in the Cochlea and Auditory Cortex of a Mouse Model of Age-Related Hearing Loss. *Audiology & neuro-otology* **2016**, *21*, 326–332, doi:10.1159/000450937.
5. Reutershan, J. Critical role of endothelial CXCR2 in LPS-induced neutrophil migration into the lung. *Journal of Clinical Investigation* **2006**, *116*, 695–702, doi:10.1172/jci27009.
6. Fan, X.; Patera, A.C.; Pong-Kennedy, A.; Deno, G.; Gonsiorek, W.; Manfra, D.J.; Vassileva, G.; Zeng, M.; Jackson, C.; Sullivan, L.; et al. Murine CXCR1 Is a Functional Receptor for GCP-2/CXCL6 and Interleukin-8/CXCL8. *Journal of Biological Chemistry* **2007**, *282*, 11658–11666, doi:10.1074/jbc.m607705200.
